# Supplementary material for: Japanese encephalitis virus neuropenetrance is driven by mast cell chymase
Source: PubMed Central journal article supplement (PMC6370868; doi:10.1038/s41467-019-08641-z), 2019-02-11

# ZO-1

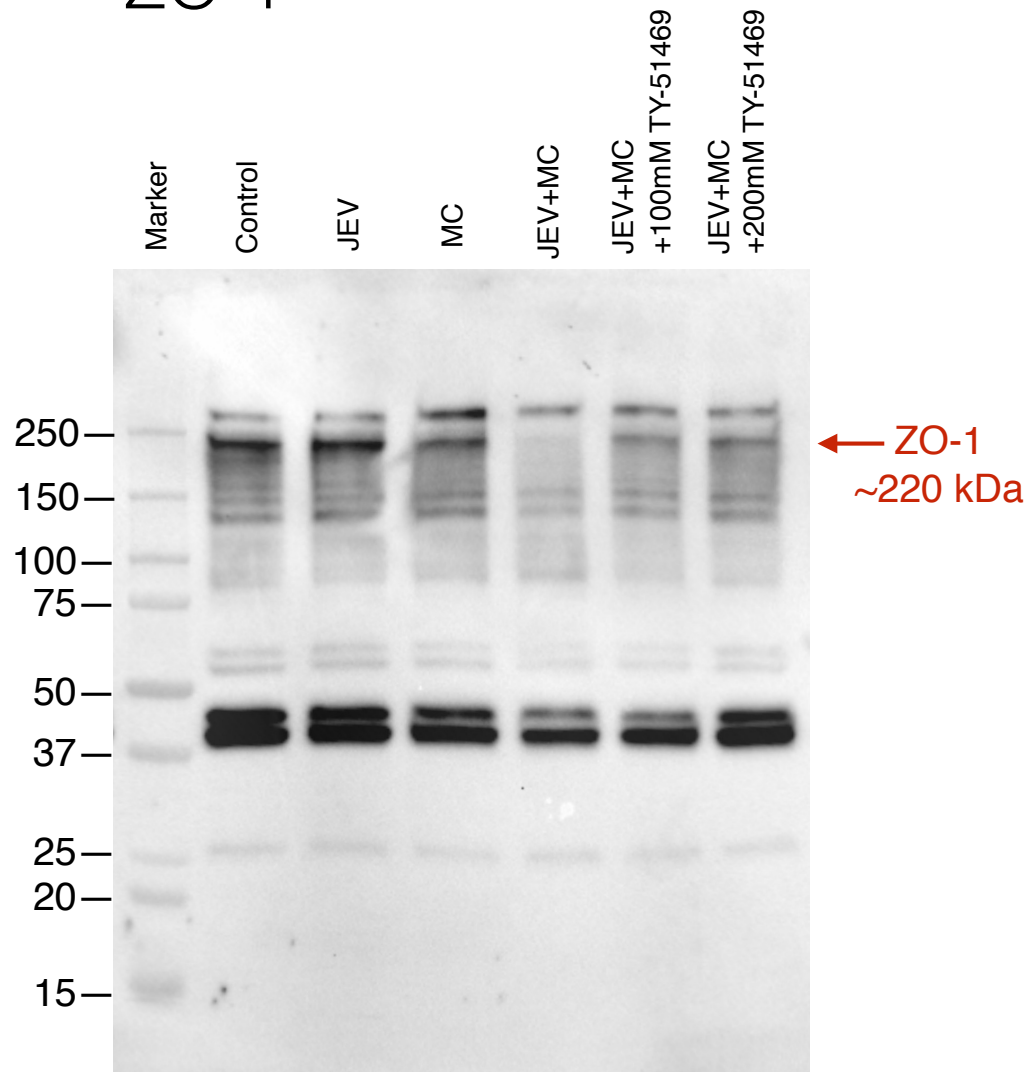

# GAPDH

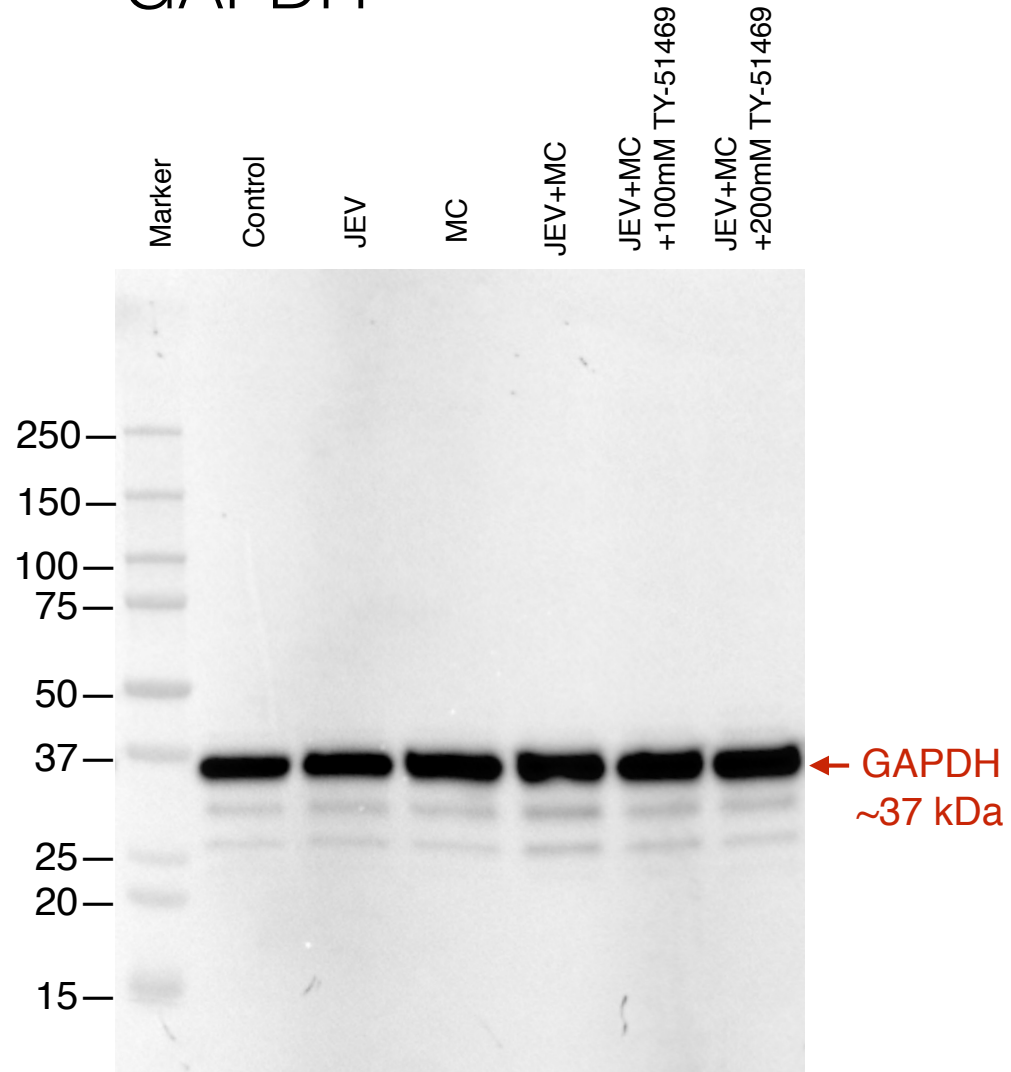

# Occludin

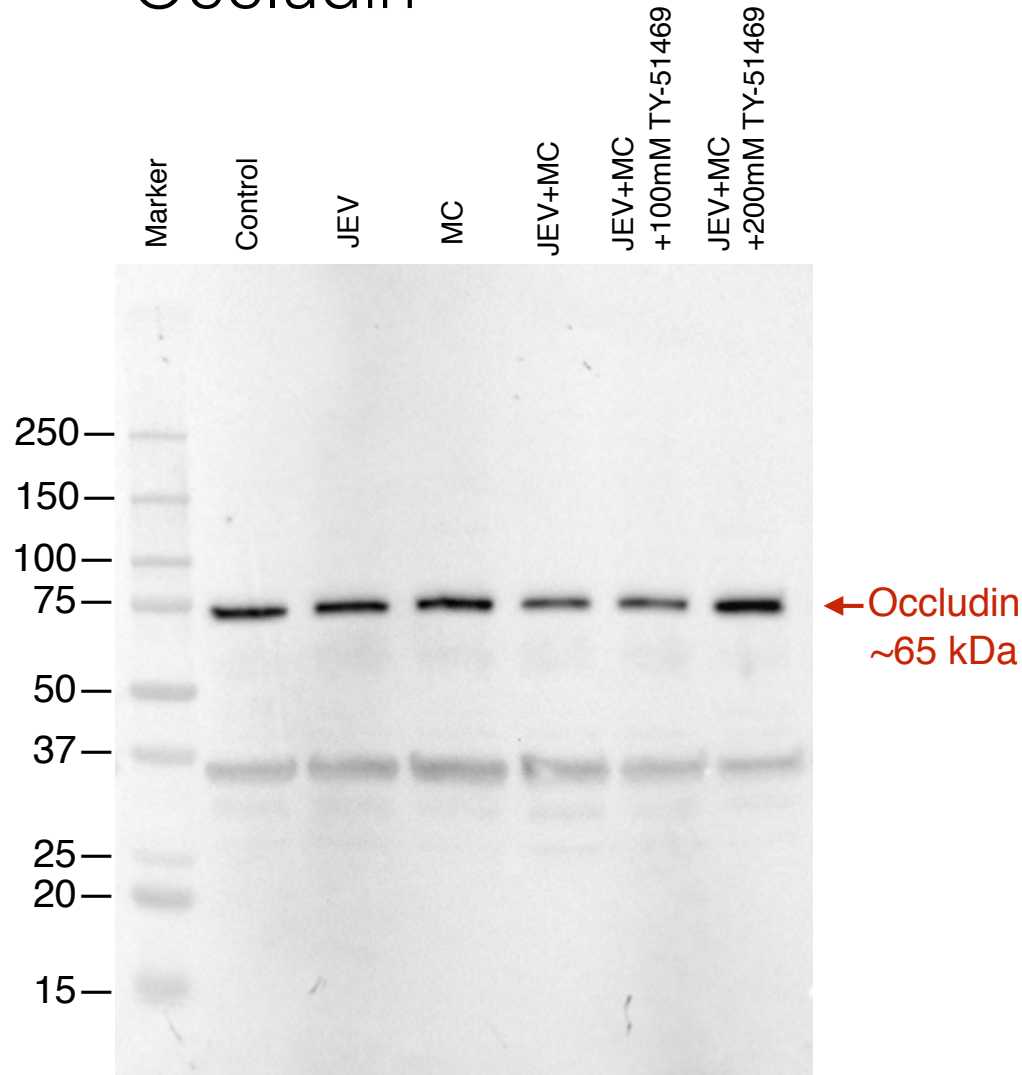

# GAPDH\*

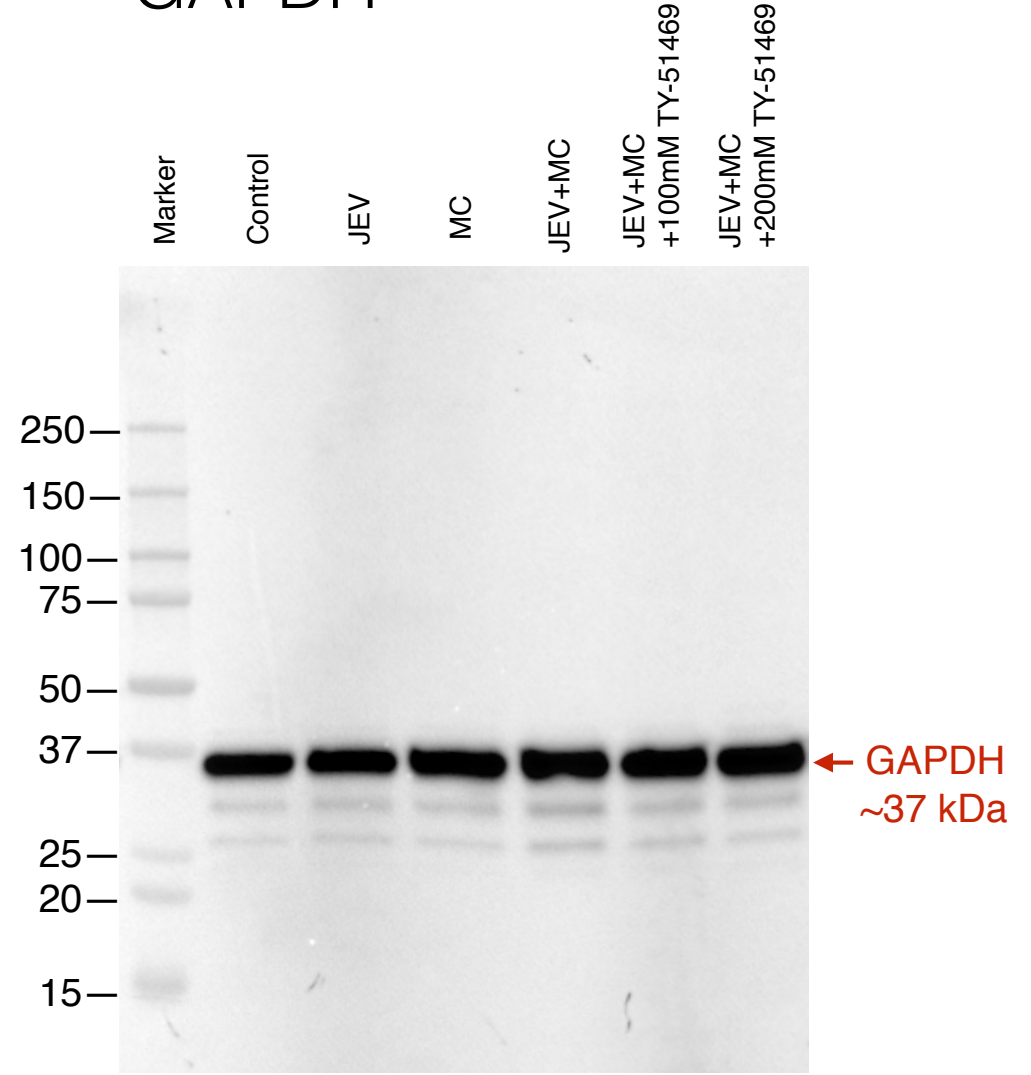

\*Note that the same blot was probed for ZO-1, Occludin and GAPDH

# Claudin-5

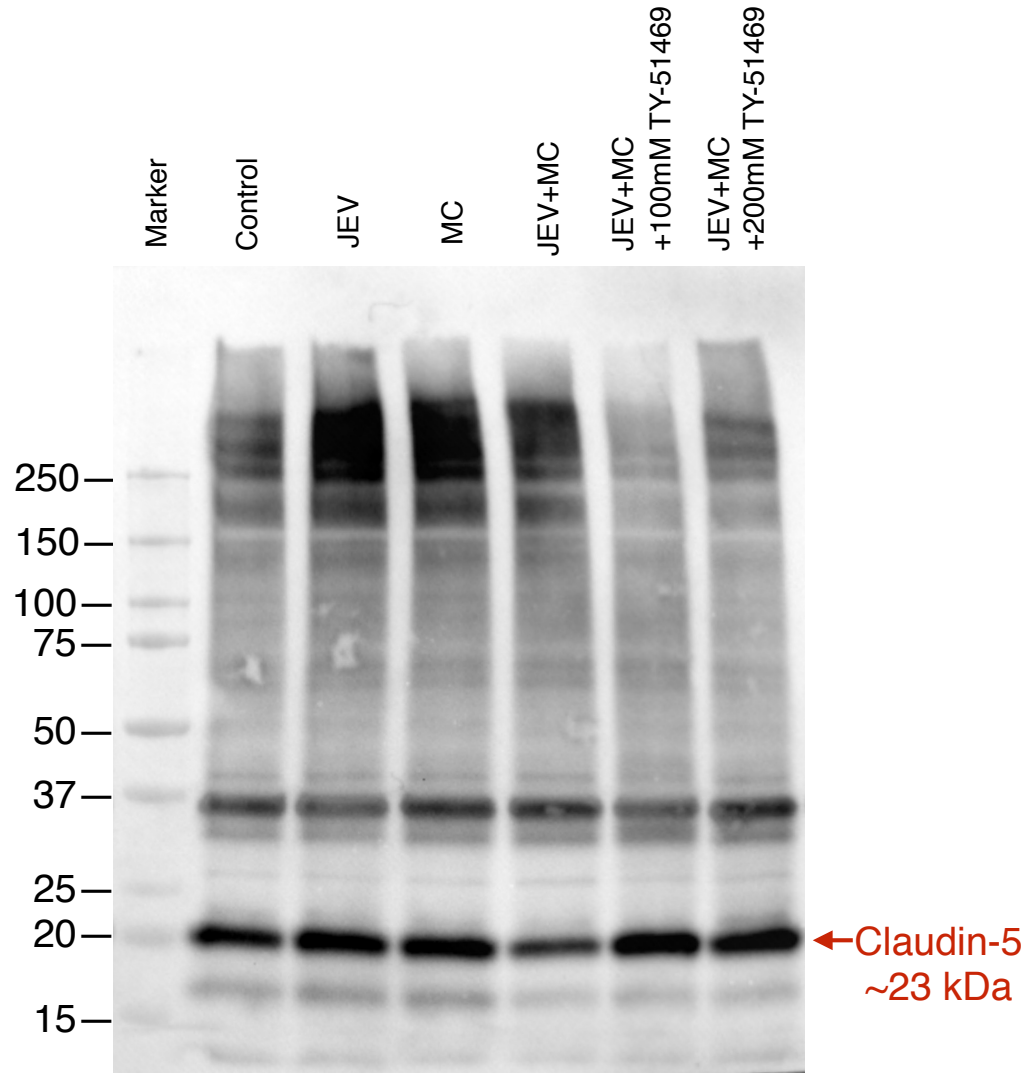

# GAPDH

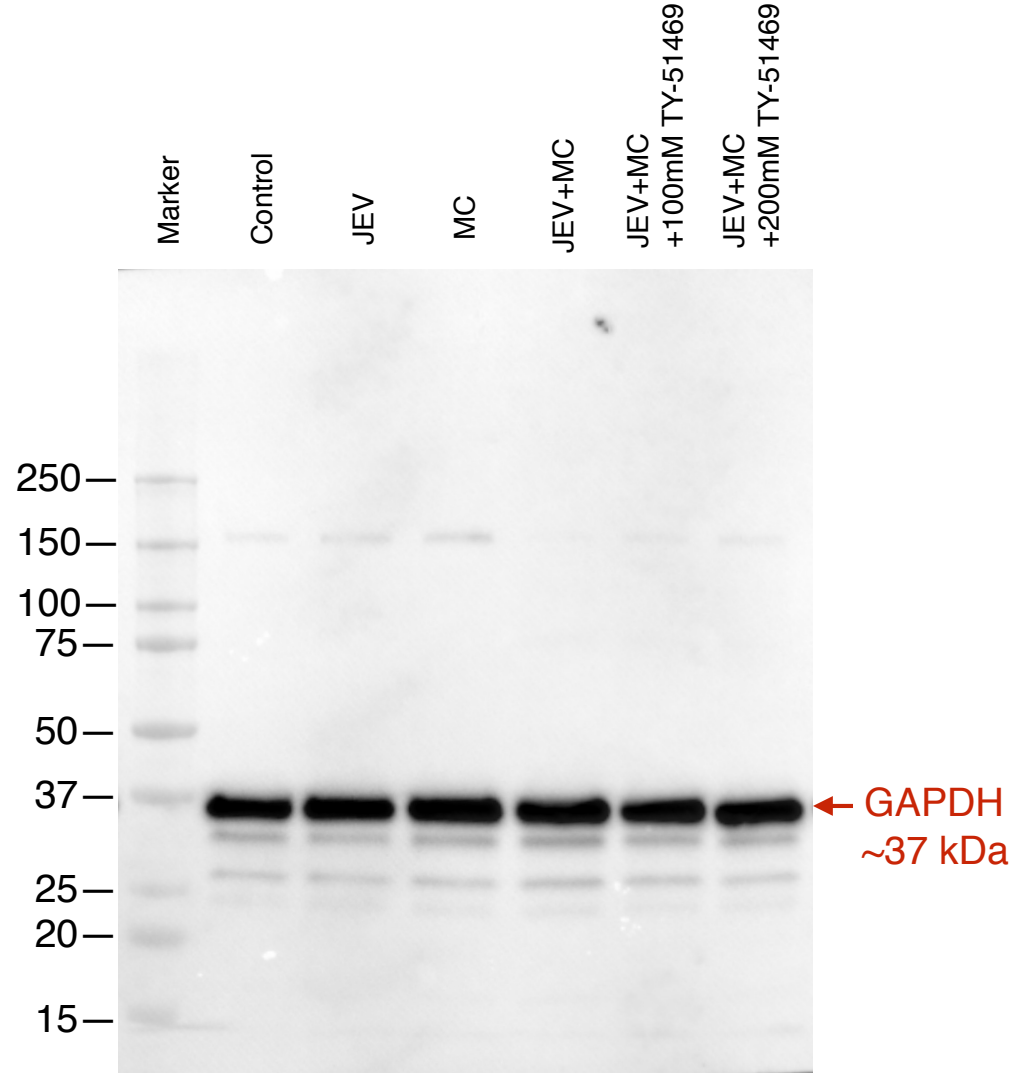

# ZO-2

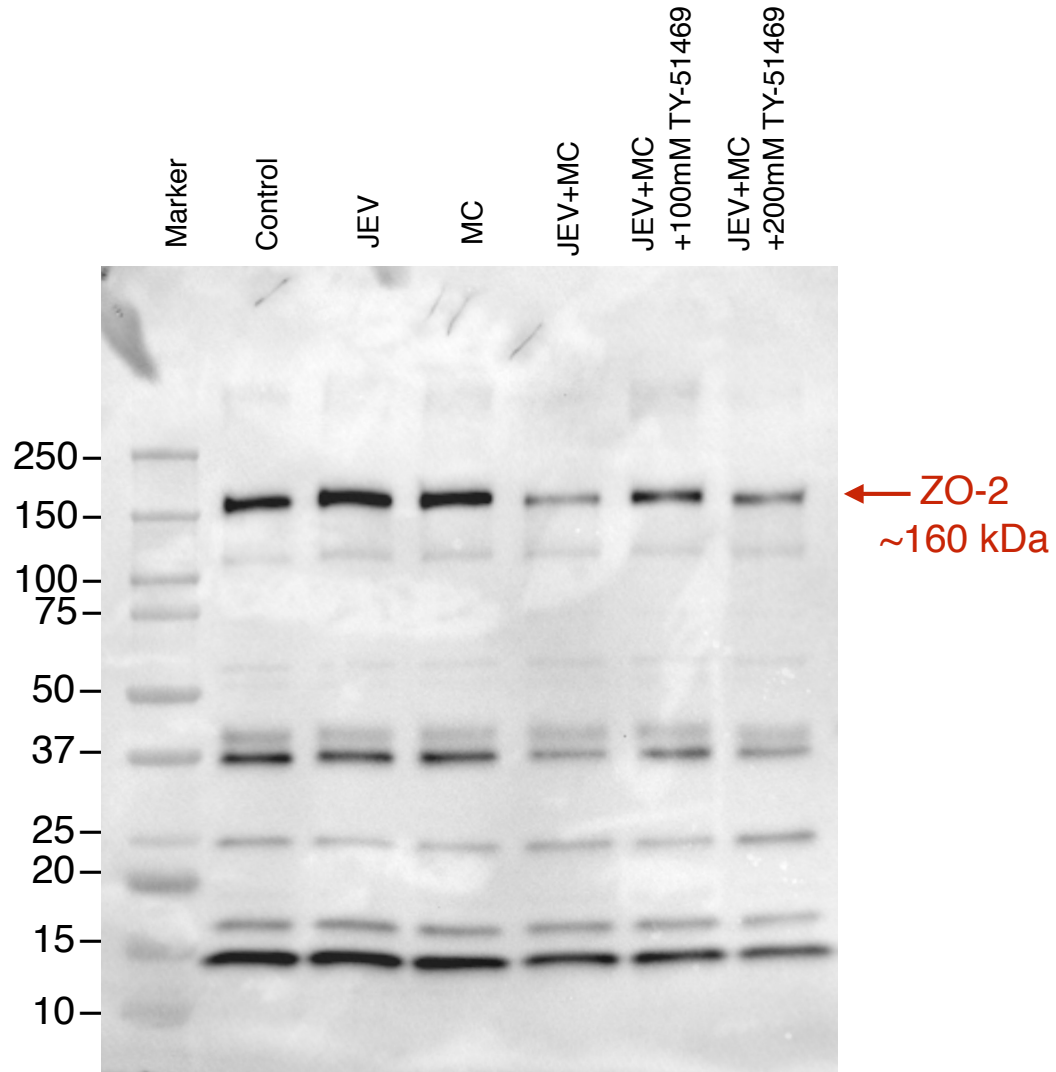

# GAPDH

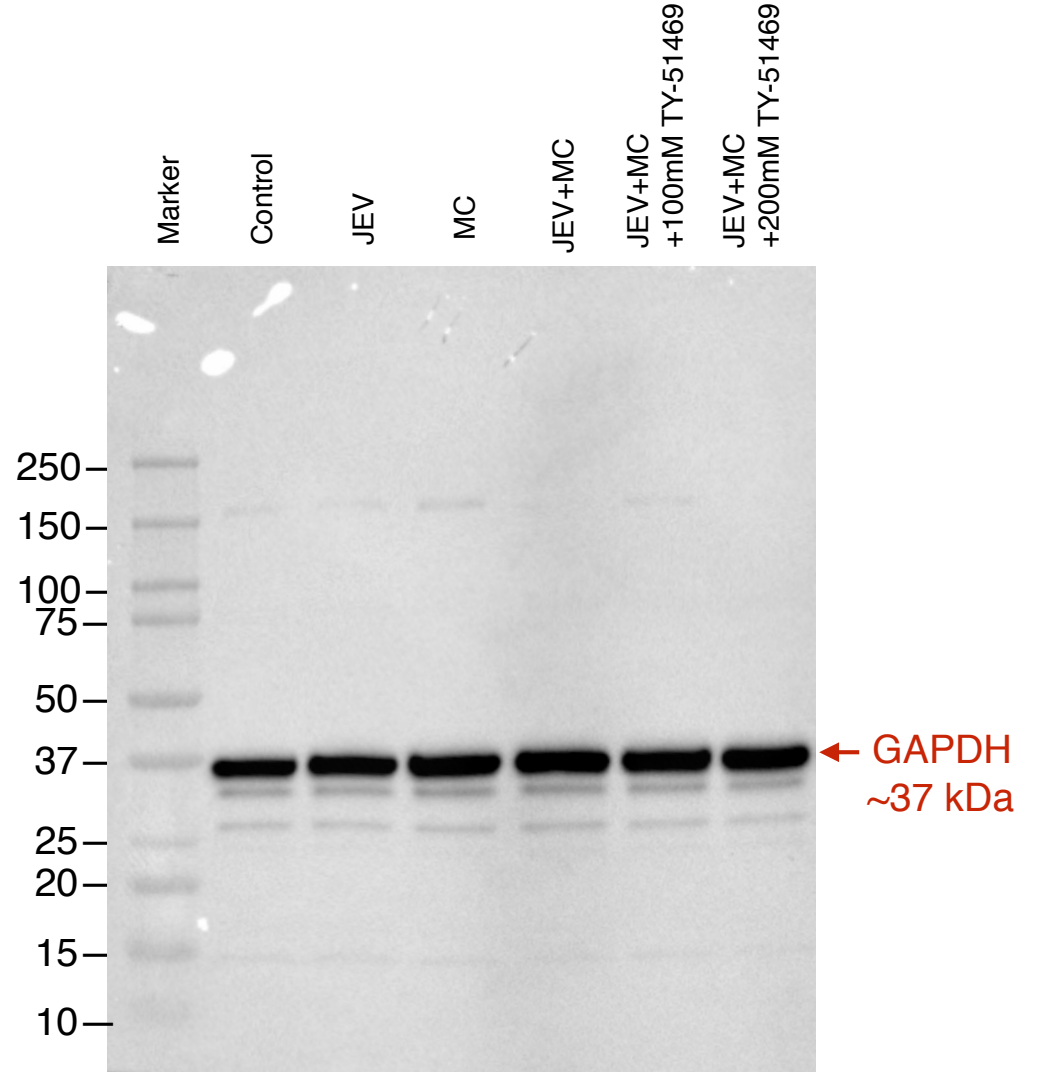

# JEV negative-strand PCR

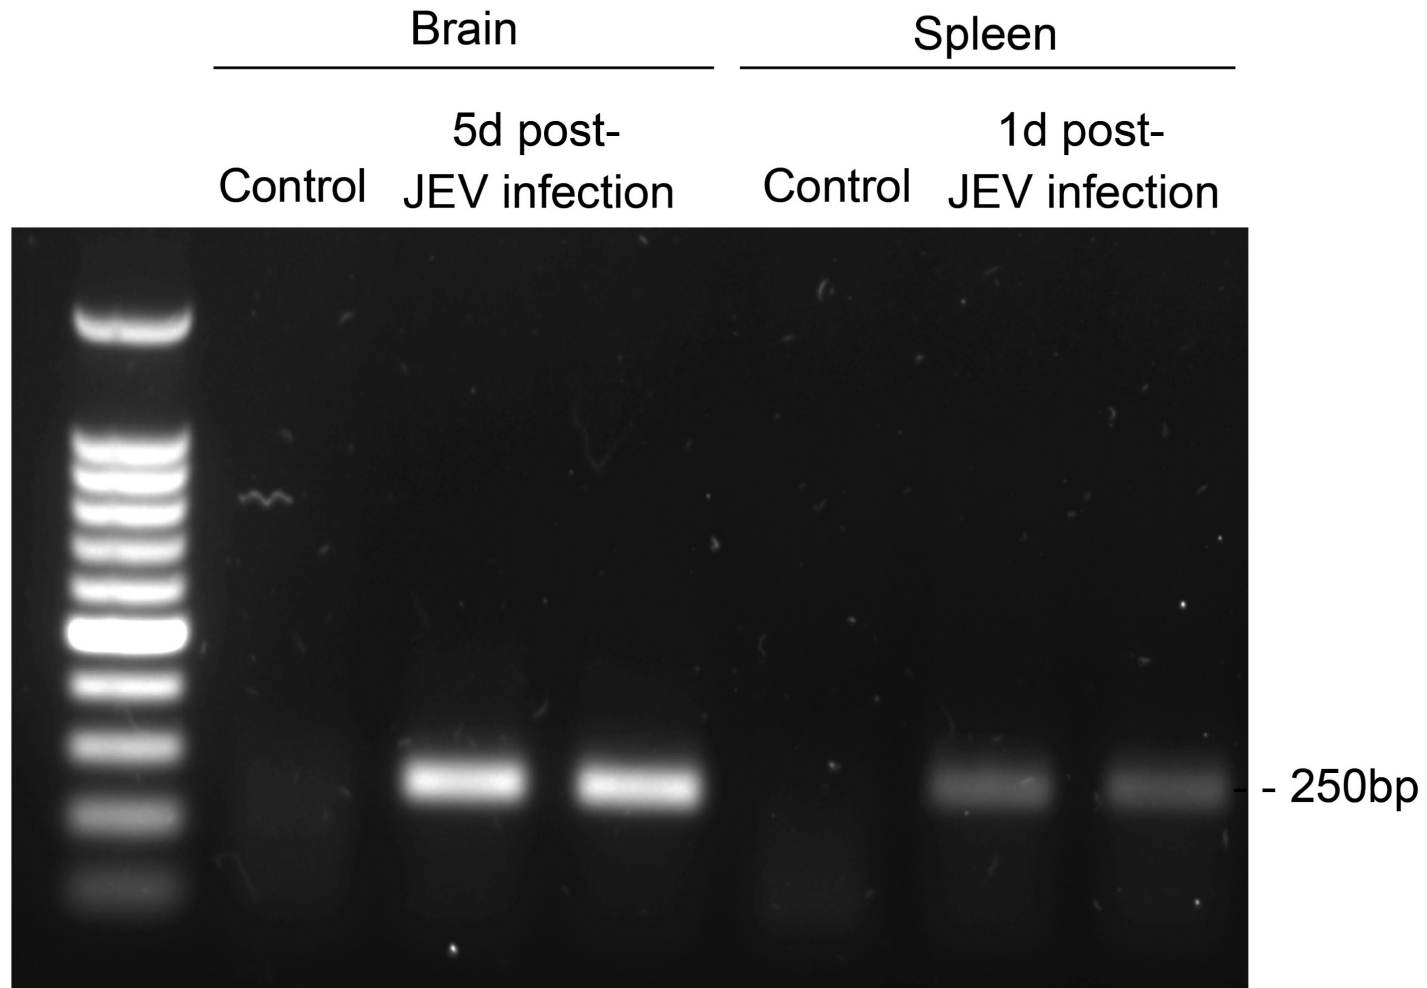

Supplement: 41467_2019_8641_MOESM4_ESM.pdf [file 41467_2019_8641_MOESM4_ESM.pdf]
